# Supplementary material for: Surface modification of adamantane-terminated gold nanoclusters using cyclodextrins
Source: Royal Society of Chemistry journal article supplement (doi:10.1039/c6cp04569c), 2016-01-01
Supplement: c6cp04569c1.pdf [file c6cp04569c1.pdf]

# Supporting Information

## Surface Modification of Adamantane-Terminated Gold Nanoclusters Using Cyclodextrins

Chunyang Yan,<sup>a,b</sup> Chao Liu,<sup>\*b</sup> Hadi Abroshan,<sup>c</sup> Zhimin Li,<sup>b</sup> Renhua Qiu,<sup>\*a</sup> and Gao Li<sup>\*b</sup>

<sup>a</sup> State Key Laboratory of Chemo/Biosensing and Chemometrics, College of Chemistry and Chemical Engineering, Hunan University, Changsha 410000, China.

<sup>b</sup> Gold Catalysis Research Centre, State Key Laboratory of Catalysis, Dalian Institute of Chemical Physics, Chinese Academy of Sciences, Dalian 116023, P. R. China.

<sup>c</sup> Department of Chemistry, Carnegie Mellon University, Pittsburgh, PA 15213, United States.  
Email: renhuaqiu@hnu.edu.cn, chaoliu@dicp.ac.cn, gaoli@dicp.ac.cn

### Content

**Figure S1.** UV-vis and MALDI mass spectrum of Au<sub>38</sub>S<sub>2</sub>(SAdm)<sub>20</sub> in the presence of  $\alpha$ -CD.

**Figure S2.** UV-vis and MALDI mass spectrum of Au<sub>38</sub>S<sub>2</sub>(SAdm)<sub>20</sub> in the presence of  $\gamma$ -CD.

**Scheme S1.** Illustrations of the inclusion of adamantine group into the cavity of  $\beta$ -CD.

**Figure S3.** Path between two states of a system: an adamantine occupies the cavity of a cyclodextrin and the adamantine is relatively far away from the cyclodextrin.

**Figure S4.** The view of the Au<sub>38</sub>S<sub>2</sub>(SAdm)<sub>20</sub> nanoclusters along different direction.

**Figure S5.** <sup>1</sup>H NMR spectra.

**Figure S6.** Anti-oxidation properties of (A) Au<sub>38</sub>S<sub>2</sub>(SAdm)<sub>20</sub> nanoclusters and (B) Au<sub>38</sub>S<sub>2</sub>(SAdm)<sub>20</sub>-( $\beta$ -CD)<sub>2</sub> conjugates.

**Figure S7.** MALDI mass spectrum of Au<sub>38</sub>S<sub>2</sub>(SAdm)<sub>20</sub>-( $\beta$ -CD)<sub>2</sub> after reaction with TBHP.

**Figure S8.** Cyclic voltammograms for the redox reaction in phosphate buffered saline containing potassium ferricyanide on Au<sub>38</sub>S<sub>2</sub>(SAdm)<sub>20</sub> nanoclusters

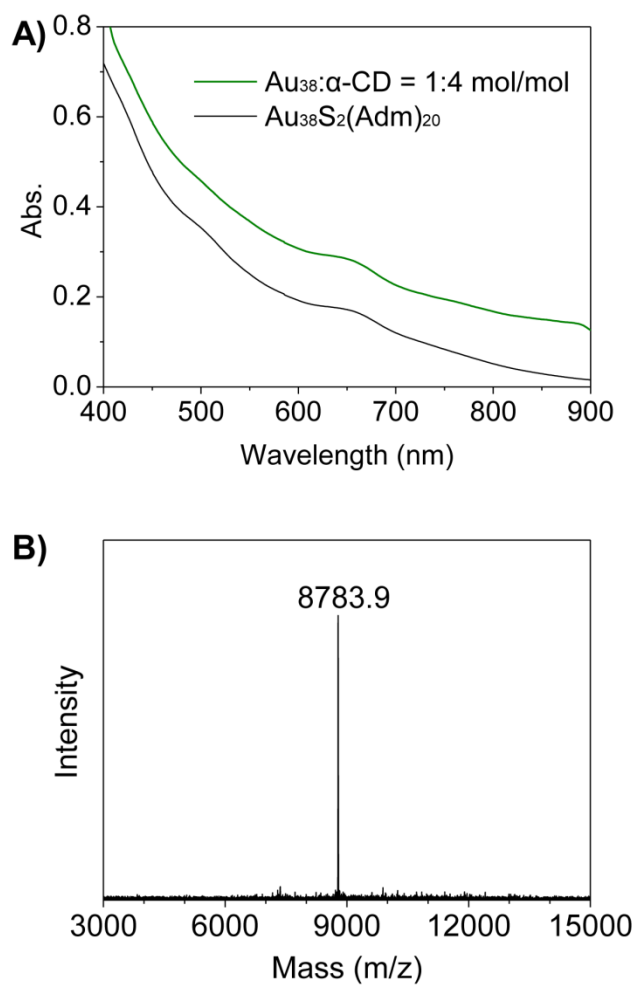

**Figure S1.** (A) UV-vis of free  $\text{Au}_{38}\text{S}_2(\text{SAdm})_{20}$  nanoclusters and  $\text{Au}_{38}\text{S}_2(\text{SAdm})_{20}$  in the presence of  $\alpha\text{-CD}$  ( $\text{Au}_{38}\text{S}_2(\text{SAdm})_{20}:\alpha\text{-CD} = 1:4$ , mol/mol). (B) Positive-mode MALDI mass spectrum of  $\text{Au}_{38}\text{S}_2(\text{SAdm})_{20}$  in the presence of  $\alpha\text{-CD}$ . Of note, the laser intensity is same with that in Figure 1B.

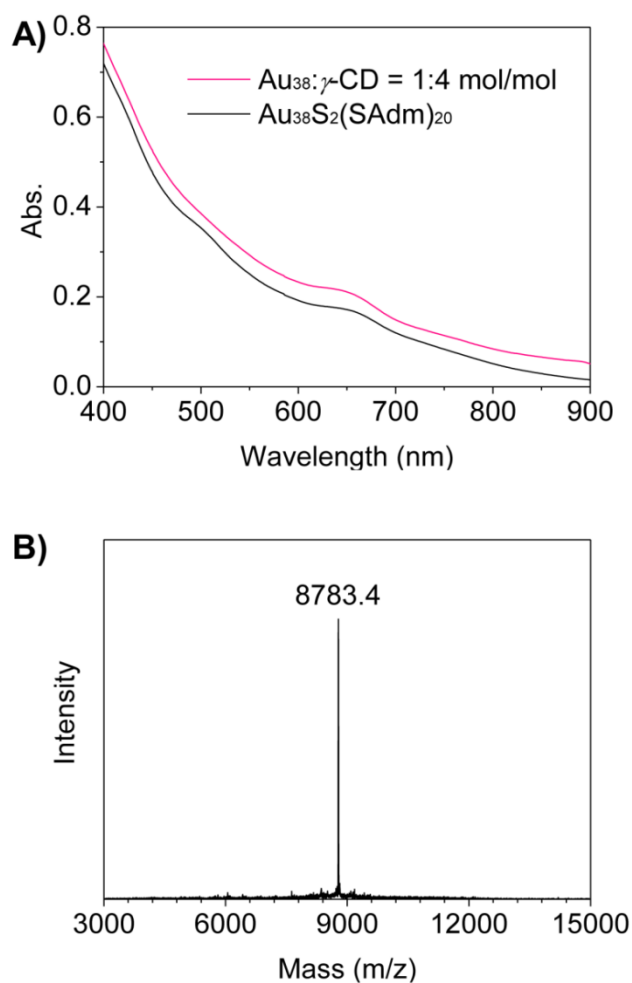

**Figure S2.** (A) UV-vis of free  $\text{Au}_{38}\text{S}_2(\text{SAdm})_{20}$  nanoclusters and  $\text{Au}_{38}\text{S}_2(\text{SAdm})_{20}$  in the presence of  $\gamma$ -CD ( $\text{Au}_{38}\text{S}_2(\text{SAdm})_{20}:\gamma\text{-CD} = 1:4$ , mol/mol). (B) Positive-mode MALDI mass spectrum of  $\text{Au}_{38}\text{S}_2(\text{SAdm})_{20}$  in the presence of  $\gamma$ -CD. Of note, the laser intensity is same with that in Figure 1B.

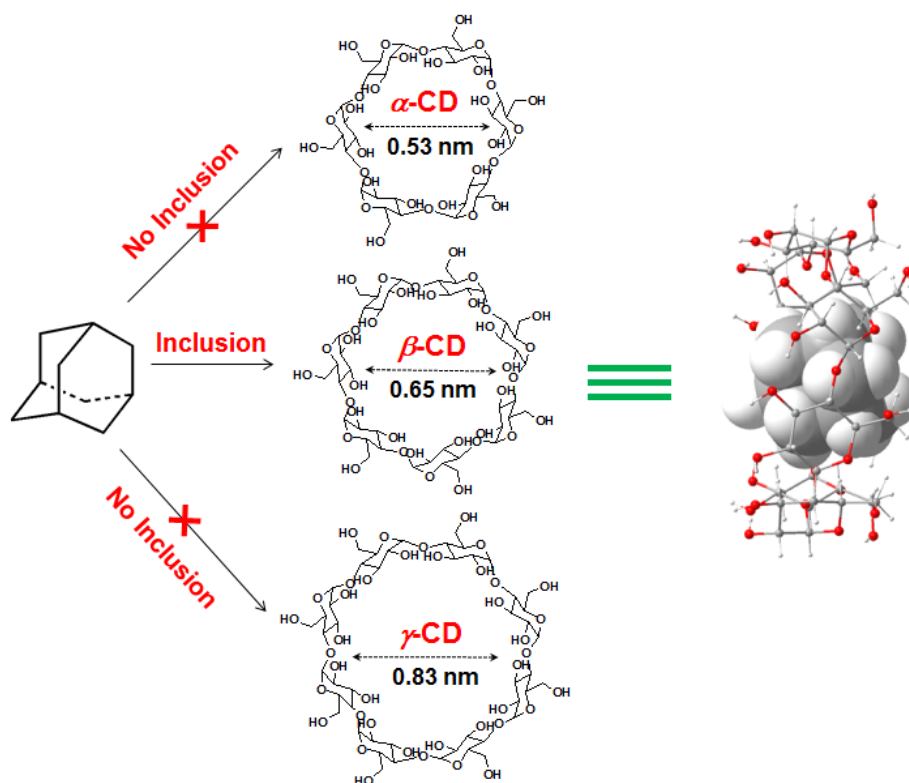

**Scheme S1.** Illustrations of the inclusion of adamantine group into the cavity of  $\beta$ -cyclodextrin ( $\beta$ -CD).

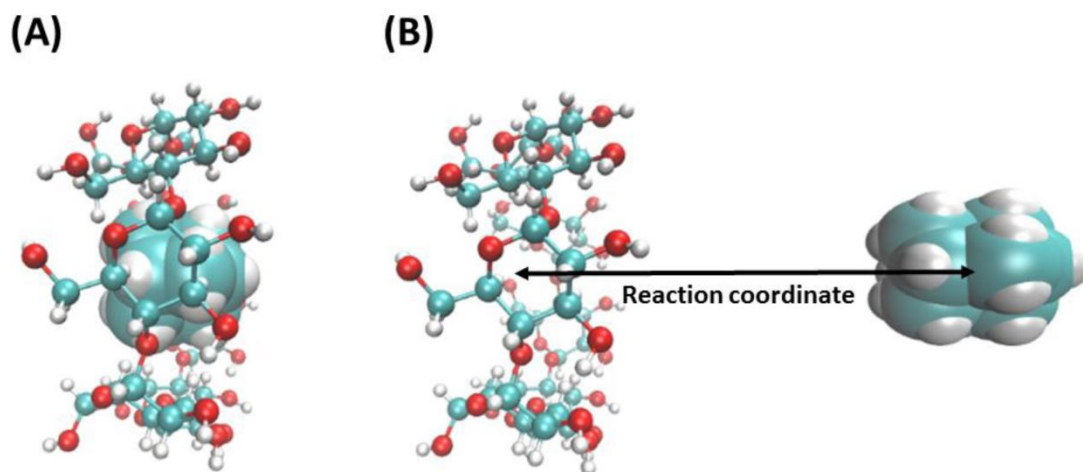

**Figure S3.** Path between two states of a system: (A) an adamantane occupies the cavity of a cyclodextrin and (B) the adamantane is relatively far away from the cyclodextrin. Of note, distance between centers of adamantane and cyclodextrin molecules is considered as the reaction coordinate.

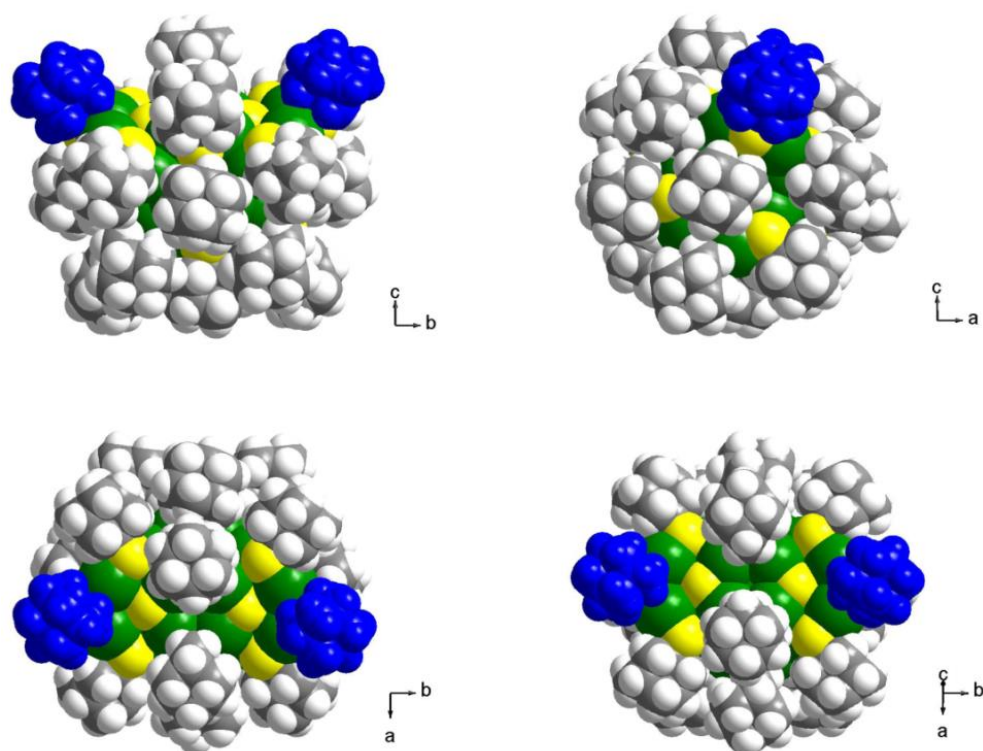

**Figure S4.** The view of the  $\text{Au}_{38}\text{S}_2(\text{SAdm})_{20}$  nanoclusters along different direction. Two adamantanethiolate ligands are colored in blue.

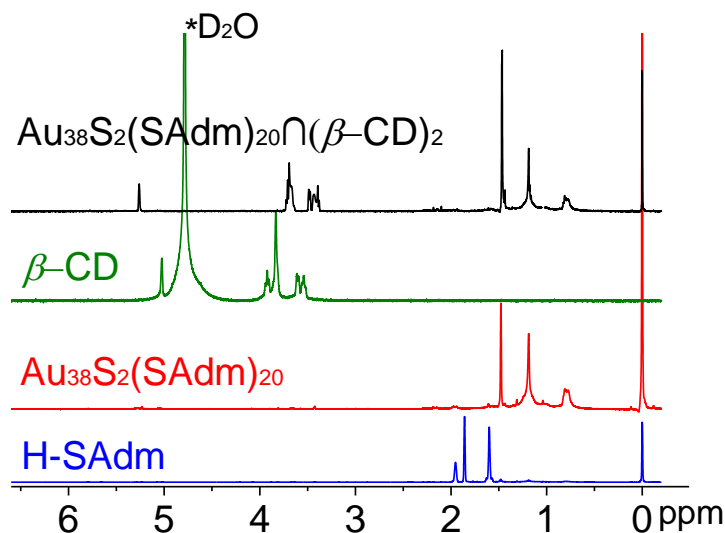

**Figure S5.**  $^1\text{H}$  NMR spectra (-0.2 to 6.8 ppm range) of the  $\beta$ -cyclodextrin, adamantanethiol ligand (H-SAdm), unmodified  $\text{Au}_{38}\text{S}_2(\text{SAdm})_{20}$  nanoclusters and  $\text{Au}_{38}\text{S}_2(\text{SAdm})_{20}-(\beta\text{-CD})_2$  conjugates.  $^1\text{H}$  NMR peaks of free H-SAdm locate at 1.95, 1.84, and 1.60 ppm. The  $^1\text{H}$  NMR peaks of  $\text{Au}_{38}\text{S}_2(\text{SAdm})_{20}$  nanocluster are red-shifted to 1.47, 1.18, and 0.79 ppm, implying that -SAdm ligands are attached to the surface gold atoms. Such compared to the free  $\beta$ -cyclodextrin, the NMR signal also shifts (Figure S4), indicating that the  $\beta$ -cyclodextrin molecules trap on the -SAdm ligand.

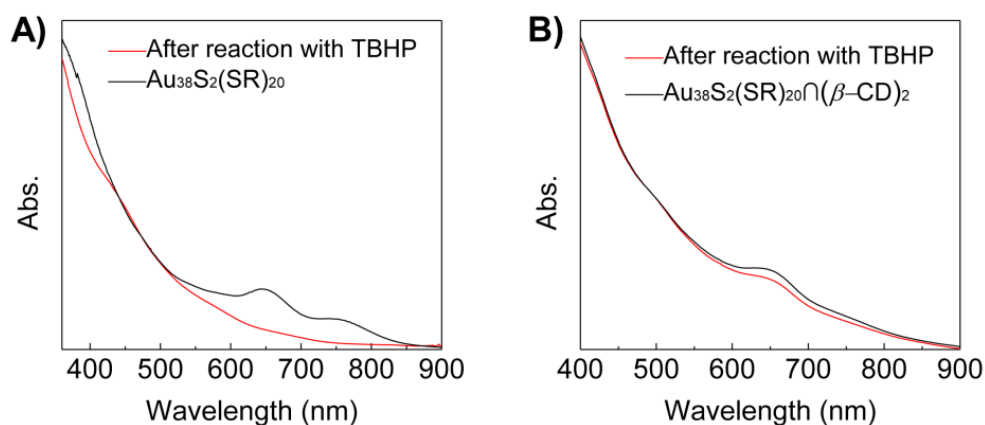

**Figure S6.** Anti-oxidation properties of (A)  $\text{Au}_{38}\text{S}_2(\text{SAdm})_{20}$  nanoclusters and (B)  $\text{Au}_{38}\text{S}_2(\text{SAdm})_{20}-(\beta\text{-CD})_2$  conjugates in the presence of TBHP oxidant (test conditions: ca. 0.1 mmol  $\text{Au}_{38}\text{S}_2(\text{SAdm})_{20}$  nanoclusters or  $\text{Au}_{38}\text{S}_2(\text{SAdm})_{20}-(\beta\text{-CD})_2$  conjugates were dissolved in THF, 2 mmol TBHP, for 10 h at room temperature).

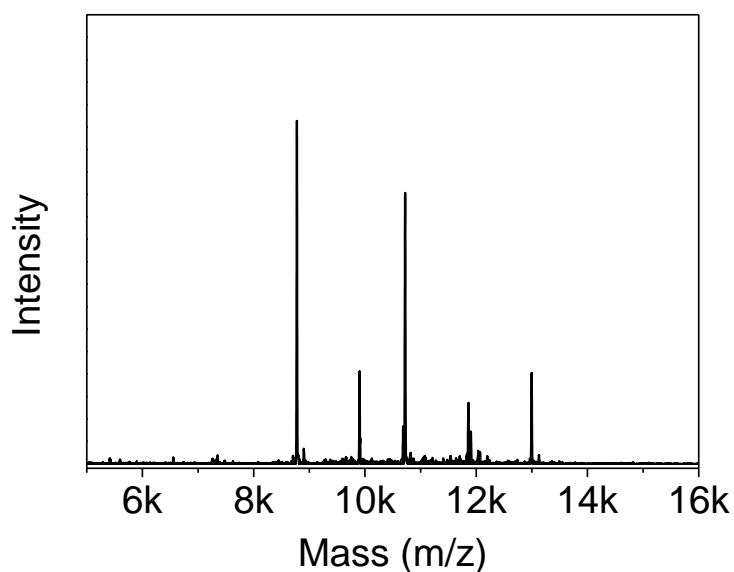

**Figure S7.** MALDI mass spectrum of  $\text{Au}_{38}\text{S}_2(\text{SAdm})_{20}-(\beta\text{-CD})_2$  after treatment with TBHP. Of note, the laser intensity is the same with that in Figure 2B.

MALDI-MS analysis of the  $\text{Au}_{38}\text{S}_2(\text{SAdm})_{20}$  nanoclusters after the treatment with TBHP was also performed. No mass peaks in  $m/z > 1000$  are found, indicating the nanoclusters are decomposed to small species.

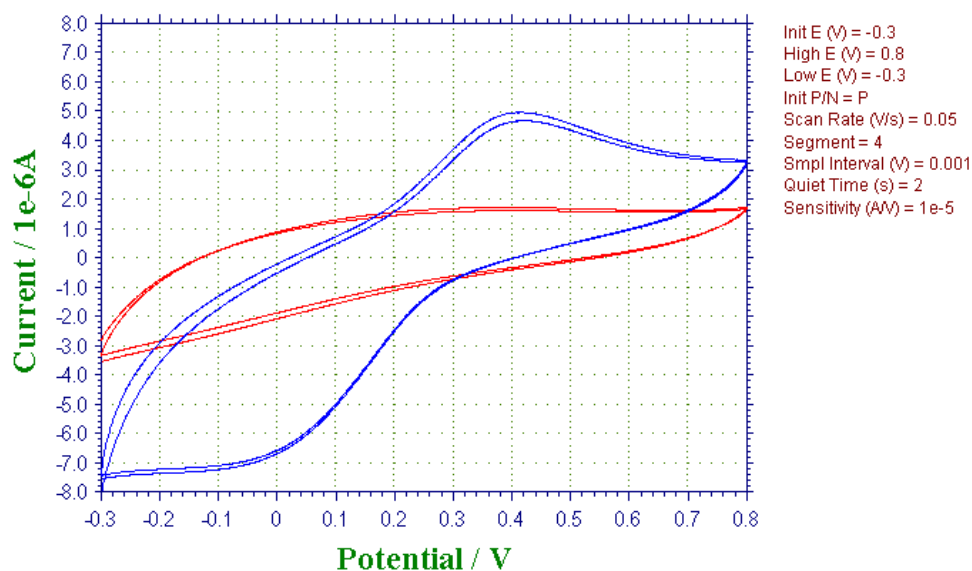

**Figure S8.** Cyclic voltammograms for the redox reaction in phosphate buffered saline containing potassium ferricyanide on  $\text{Au}_{38}\text{S}_2(\text{SAdm})_{20}$  nanoclusters (blue line) and  $\text{Au}_{38}\text{S}_2(\text{SAdm})_{20}-(\beta\text{-CD})_2$  conjugates (red line).
